# Supplementary material for: A polarized near-infrared organic phototransistor based on a narrow-band SnPc single crystal
Source: Royal Society of Chemistry journal article supplement (doi:10.1039/d4tc02799j), 2024-01-01
Supplement: d4tc02799j1.pdf [file d4tc02799j1.pdf]

## Supporting Information

Polarized near-infrared organic phototransistor based on narrow-band  
SnPc single crystal

Ying Wang,<sup>a</sup> Qianqian Du,<sup>\*a</sup> Xialian Zheng,<sup>a</sup> Yanxun Zhang,<sup>a</sup> Qing Liu,<sup>a</sup> Fengqiu  
Wang,<sup>b</sup> and Shuchao Qin<sup>\*a</sup>

<sup>a</sup>School of Physical Science and Information Engineering, Key Laboratory of Optical

Communication Science and Technology of Shandong Province, Liaocheng

University, Liaocheng 252059, China

<sup>b</sup>School of Electronic Science and Engineering, Nanjing University, Nanjing 210093,

China

Corresponding Authors:

\*E-mail: Qianqian Du (dzdq0126@163.com); Shuchao Qin (lcqinshuchao@126.com)

### S1. Surface morphology

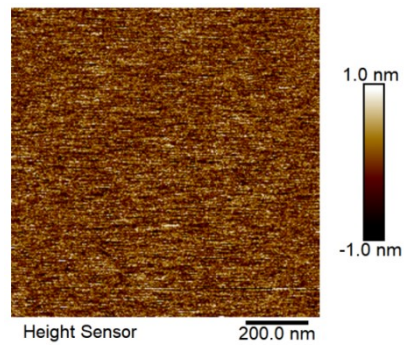

**Fig. S1.** Surface morphology of a typical SnPc single crystal.

### S2. Cross-polarized microscopy images

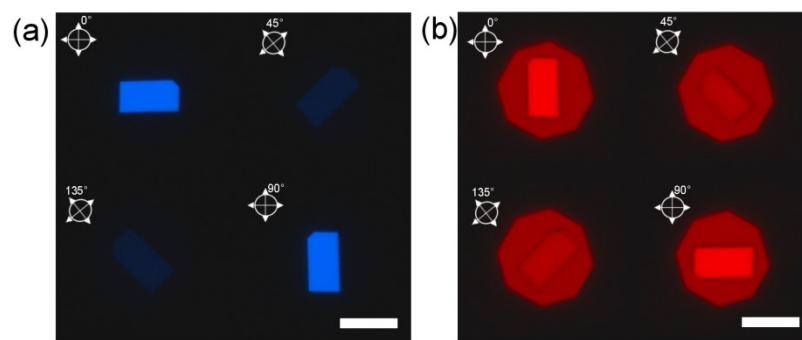

**Fig. S2.** Cross-polarized optical microscopy images of a SnPc single crystal under different polarization directions for 470 nm and 625 nm LED light illumination. Scale bar: 20  $\mu\text{m}$ .

### S3. The relationship between absorption and bandgap

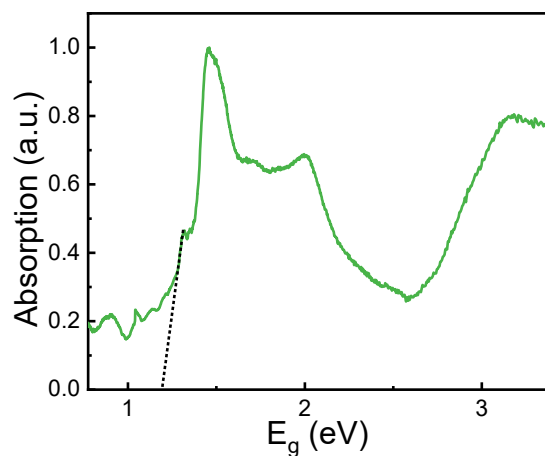

**Fig. S3.** The relationship between absorption and  $E_g$ .

#### S4. Selected area electron diffraction (SAED)

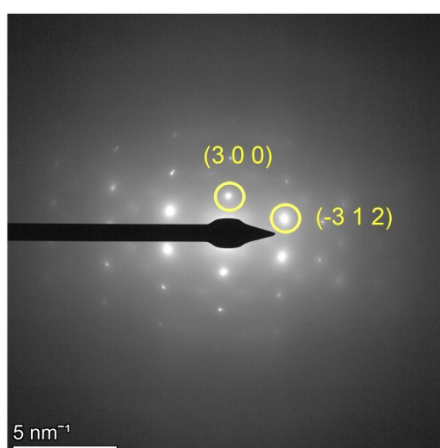

**Fig. S4.** Selected area electron diffraction and calibration of crystal face.

#### S5. Thickness of the SnPc single crystal.

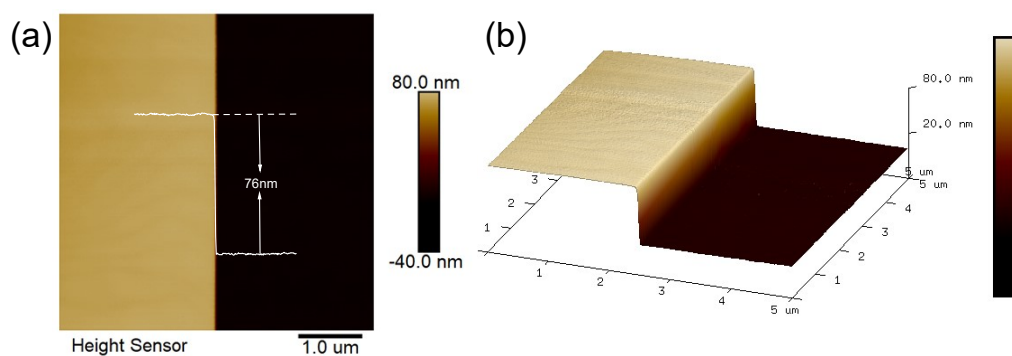

**Fig. S5.** (a) AFM of the SnPc single crystal and the corresponding thickness. (b) The 3D

nature of the SnPc single crystal.

### S6. The output curve

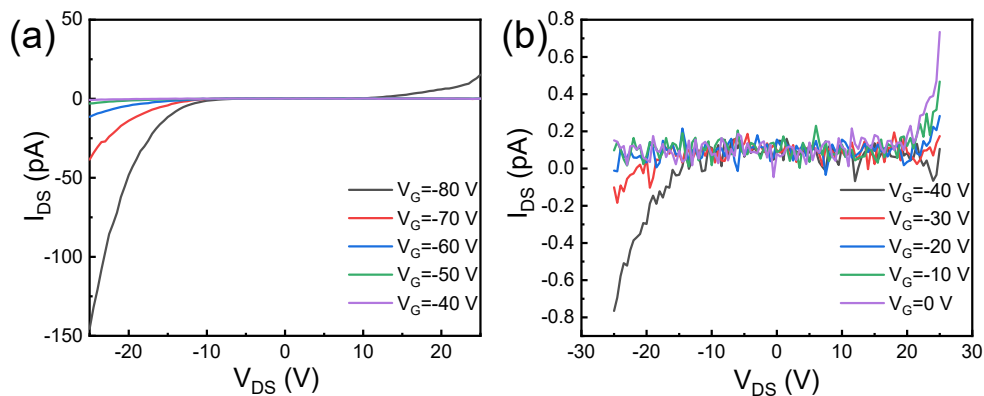

**Fig. S6.** (a,b) Output curves of the device under different gate voltages under dark.

### S7. Log-scale photocurrent as the function of incident light power

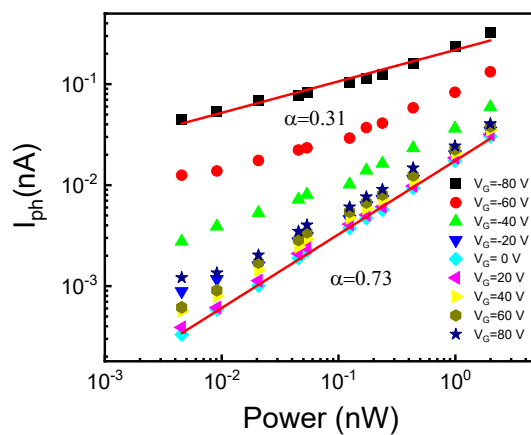

**Fig. S7.** Log-scale photocurrent as the function of incident light power under different gate voltages.

### S8. Transfer curves and temporal photoresponse at different temperatures

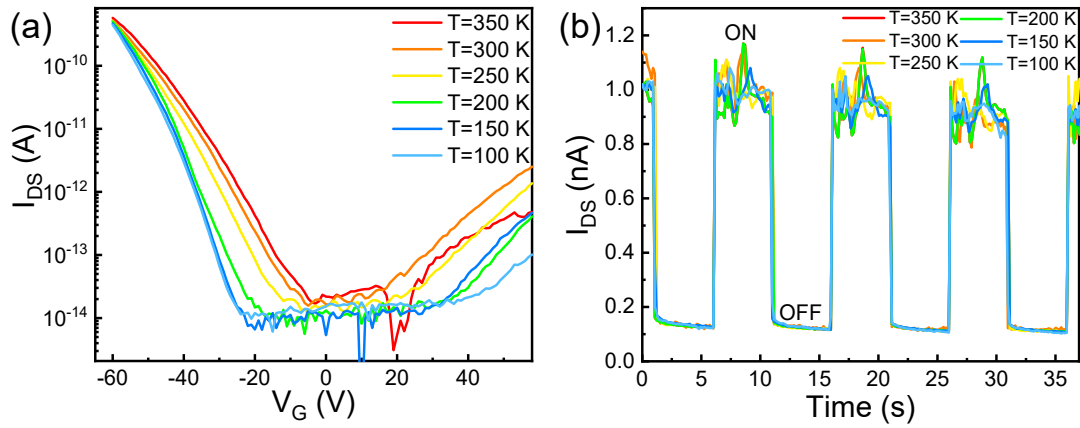

**Fig. S8.** (a) Transfer curves of the device in dark at different temperatures, at  $V_{DS} = 25$  V. (b) Temporal photoresponse for 850 nm at different temperatures, at  $V_{DS} = 25$  V.

**S9. A home-constructed single pixel scanning imaging system with linear polarized regulation.**

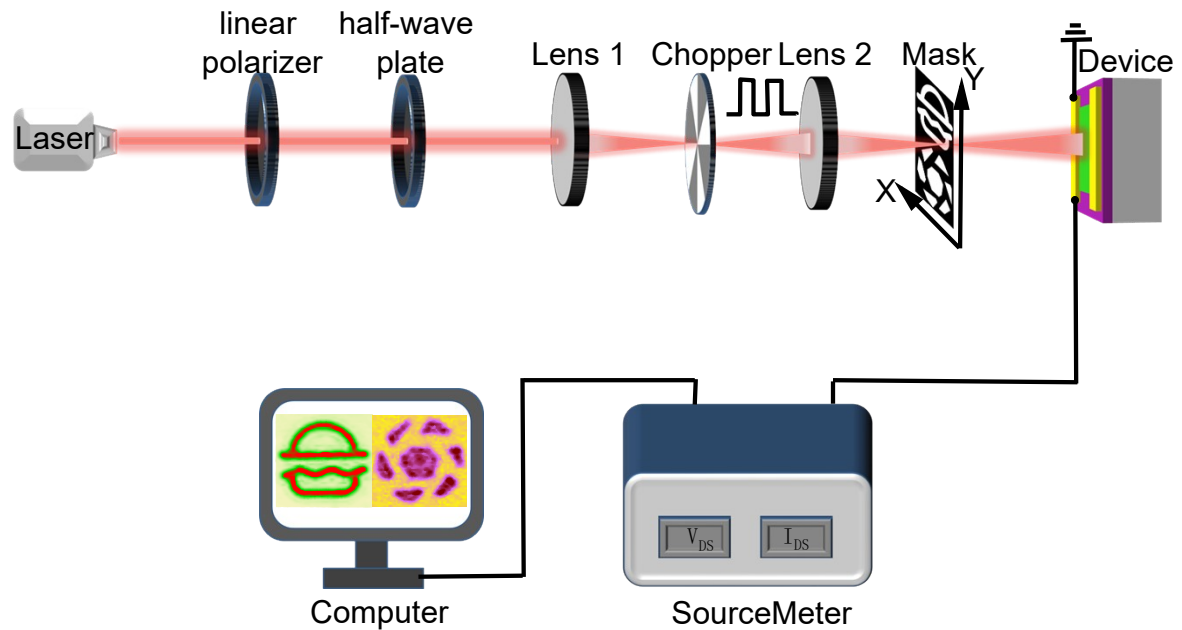

**Fig. S9.** The home-constructed single pixel scanning imaging system.

**S10. Other single-pixel imaging**

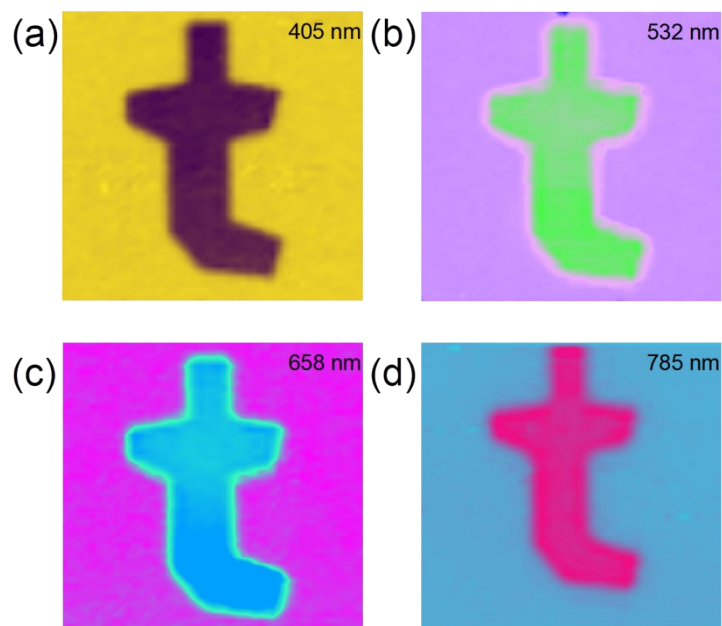

**Fig. S10.** Acquired  $100 \times 100$  scanned pixels high-speed photocurrent imaging results for the objects, using 1.5 k Hz-modulated light signal (405, 532, 658 and 785 nm).

**S11. The interfacial dipole barrier.**

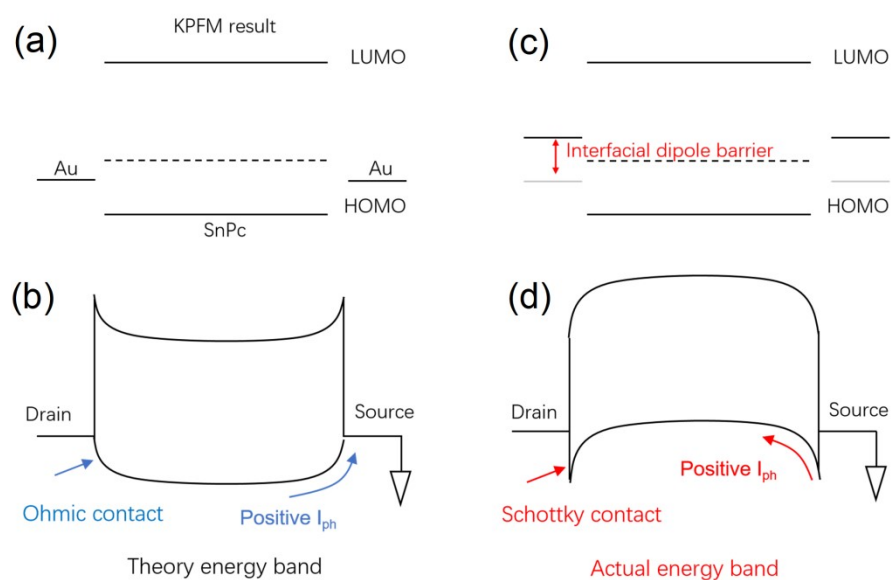

**Fig. S11.** (a) Energy profiles of Au and SnPc before contacting. (b) Theory schematic band diagram based on KPFM result. (c) Interfacial dipole that reduces the work function of Au. (d) Actual schematic band diagram corresponding to photocurrent mapping results.

**Table 1. Comparison of our photodetector with other similar photodetectors.**

| operating wavelengths (nm) | Device structures                                    | Responsivity (A/W)    | response time (s)/<br>EQE  | D* (Jones)              |
|----------------------------|------------------------------------------------------|-----------------------|----------------------------|-------------------------|
| 850                        | This Work (SnPc single crystal)                      | 38.5                  | 5.9×10 <sup>-4</sup> /57%  | 1.12×10 <sup>10</sup>   |
| 800                        | ZnTPP-C <sub>60</sub> cocrystals (ZCCs) <sup>1</sup> | 2.424                 | 0.6                        | 3.77×10 <sup>11</sup>   |
| 850                        | dimeric porphyrin small molecule <sup>2</sup>        | 0.33                  | 48%                        | 5.73×10 <sup>13</sup>   |
| 770                        | P3HT/PC70BM <sup>3</sup>                             | >10                   | 1643%                      | ~ 10 <sup>13</sup>      |
| 740                        | 8H2Pc:PC61BM(1:1) <sup>4</sup>                       | 0.2                   | 29%                        | 1.3 × 10 <sup>12</sup>  |
| 850                        | SnPc film <sup>5</sup>                               | 1.06×10 <sup>-4</sup> | 1.5%                       | 2.88×10 <sup>-11</sup>  |
| 850                        | pentacene/SnPc/C60 <sup>5</sup>                      | 2.68                  | 4×10 <sup>-4</sup>         | 1.41 × 10 <sup>12</sup> |
| 850                        | pentacene/SnPc:C60/C60 <sup>5</sup>                  | 0.27                  | 38.8%                      | 1.52 × 10 <sup>11</sup> |
| 980                        | This Work (SnPc single crystal)                      | 2.65                  | 2.1×10 <sup>-3</sup> /1.3% | 7.75× 10 <sup>8</sup>   |
| 960                        | CO1-4Cl <sup>6</sup>                                 | 0.5                   | 50%                        | ~10 <sup>12</sup>       |
| 1000                       | DTPC/NFAs <sup>7</sup>                               | 0.27                  | 6×10 <sup>-7</sup>         | 9.24×10 <sup>13</sup>   |
| 960                        | PbPc/C <sub>60</sub> <sup>8</sup>                    | 0.0358                | 4.4%                       | >10 <sup>12</sup>       |
| 907                        | PBTTT:PC71BM <sup>9</sup>                            | 0.05                  | 7.5%                       | NA                      |

## References

1. Y. Wang, H. Wu, W. Zhu, X. Zhang, Z. Liu, Y. Wu, C. Feng, Y. Dang, H. Dong, H. Fu and W. Hu, *Angew. Chem. Int. Ed.*, 2021, **60**, 6344-6350.
2. L. Xiao, S. Chen, X. Chen, X. Peng, Y. Cao and X. Zhu, *J. Mater. Chem. C*, 2018, **6**, 3341-3345.
3. Z. Lan, Y. Lei, W. Chan, S. Chen, D. Luo and F. Zhu, *Sci. Adv.*, 2020, **6**, eaaw8065.
4. S. Kabir, Y. Takayashiki, J. Hanna and H. Iino, *Jpn. J. Appl. Phys.*, 2023, **62**, SC1013.
5. Y. Liang, W. Lv, X. Luo, L. He, K. Xu, F. Zhao, F. Huang, F. Lu and Y. Peng, *Synth. Met.*, 2018, **240**, 44-51.
6. J. Huang, J. Lee, J. Vollbrecht, V. Brus, A. Dixon, D. Cao, Z. Zhu, Z. Du, H. Wang, K. Cho, G. Bazan and T. Nguyen, *Adv. Mater.*, 2019, **32**, 1906027.
7. Y. Xia, C. Geng, X. Bi, M. Li, Y. Zhu, Z. Yao, X. Wan, G. Li and Y. Chen, *Adv. Optical Mater.*, 2023, **12**, 2301518.
8. M. Choi, S. Lee, H. Kim and J. Kim, *Org. Electron.*, 2018, **61**, 164-169.
9. M. Gibert-Roca, P. Molet, A. Mihi and M. Campoy-Quiles, *J. Mater. Chem. C*, 2020, **8**, 9688-9696.
